# Supplementary material for: High Fecal Carriage of Multidrug Resistant Bacteria in the Community among Children in Northwestern Tanzania
Source: MDPI journal article supplement (doi:10.3390/pathogens11030379), 2022-03-21
Supplement: s1 [file s1]

# Supplementary file 1:

Multidrug resistance patterns among HIV and non-HIV infected children below five years of age.

| MDR phenotype | Resistance Phenotype |     |     | HIV infected | Non-HIV in-<br>fected | P Value | Overall |
|---------------|----------------------|-----|-----|--------------|-----------------------|---------|---------|
| MDR 1         | SXT                  | TET | CRO | 49.4%        | 40.4%                 | 0.163   | 43.2%   |
| MDR2          | SXT                  | TET | CIP | 37.7%        | 31.6%                 | 0.325   | 33.5    |
| MDR3          | SXT                  | TET | CN  | 22.4%        | 6.2%                  | 0.000   | 11.2    |
| MDR4          | CRO                  | CIP | CN  | 16.5%        | 6.7%                  | 0.012   | 9.7     |
| MDR5          | SXT                  | CIP | CRO | 32.9%        | 26.4%                 | 0.267   | 28.4    |
| MDR6          | TET                  | CN  | CRO | 17.7%        | 5.2%                  | 0.001   | 7.0%    |
| MDR7          | TET                  | CIP | CRO | 25.9%        | 19.7%                 | 0.248   | 21.6%   |
| MDR8          | CN                   | TET | CIP | 18.8%        | 5.2%                  | 0.000   | 9.4%    |
| MDR9          | SXT                  | TET | CN  | 22.4%        | 6.2%                  | 0.000   | 11.2%   |
| MDR10         | SXT                  | TET | CIP | 22.1%        | 23.3%                 | 0.780   | 22.9%   |
| Overall MDR   | -                    | -   | -   | 58.8%        | 48.7%                 | 0.120   | 51.8    |

Key: SXT Sulphamethoxazole/trimethoprim, TET = tetracycline, CIP = ciprofloxacin, CN=Gentamicin, CRO= Ceftriaxone.
